# Supplementary material for: SARS-CoV-2 disrupts clinical research: the role of a rare disease-specific trial network
Source: PubMed Central journal article supplement — Eur Respir J. 2020 Sep 17;56(3):2002114. doi: 10.1183/13993003.02114-2020 (PMC7411273; doi:10.1183/13993003.02114-2020), 2020-09-17
Supplement: ERJ-02114-2020.Shareable.pdf [file ERJ-02114-2020.Shareable.pdf]

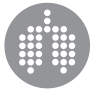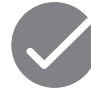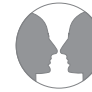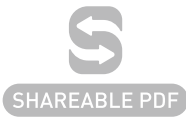

# SARS-CoV-2 disrupts clinical research: the role of a rare disease-specific trial network

Silke van Koningsbruggen-Rietschel<sup>1</sup>, Fiona Dunlevy<sup>2</sup>, Veerle Bulteel<sup>2</sup>, Damian G. Downey<sup>3</sup> and Lieven Dupont<sup>4</sup>

**Affiliations:** <sup>1</sup>CF Centre Cologne, Children's Hospital, University of Cologne, Faculty of Medicine and University Hospital Cologne, Cologne, Germany. <sup>2</sup>European Cystic Fibrosis Society, Karup, Denmark. <sup>3</sup>Centre for Experimental Medicine, Queen's University Belfast, Belfast, UK. <sup>4</sup>CF Center and Lung Transplant Unit, University Hospitals Leuven, Leuven, Belgium.

**Correspondence:** Silke van Koningsbruggen-Rietschel, Children's Hospital, University of Cologne, CF Center Cologne, Kerpenerstr. 62, Cologne 50924, Germany. E-mail: [Silke.vanKoningsbruggen@uk-koeln.de](mailto:Silke.vanKoningsbruggen@uk-koeln.de)

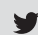

@ERSpublications

**Rare disease patients may suffer delayed access to new drugs as SARS-CoV-2 is disrupting clinical trials. This survey demonstrates that the European Cystic Fibrosis Clinical Trials Network is ideally placed to track and address such disruption.** <https://bit.ly/3hCw5dq>

**Cite this article as:** van Koningsbruggen-Rietschel S, Dunlevy F, Bulteel V, *et al.* SARS-CoV-2 disrupts clinical research: the role of a rare disease-specific trial network. *Eur Respir J* 2020; 56: 2002114 [<https://doi.org/10.1183/13993003.02114-2020>].

This single-page version can be shared freely online.

*To the Editor:*

Severe acute respiratory syndrome coronavirus 2 (SARS-CoV-2) has disrupted clinical trials worldwide [1]. This could delay the approval of new medicines and reduce access to investigational treatments *via* clinical trials. This particularly impacts patients with rare diseases such as cystic fibrosis (CF).
